# Supplementary material for: Developing a clinically relevant radiosensitizer for temozolomide-resistant gliomas
Source: PubMed Central journal article supplement (PMC7470340; doi:10.1371/journal.pone.0238238), 2020-09-03

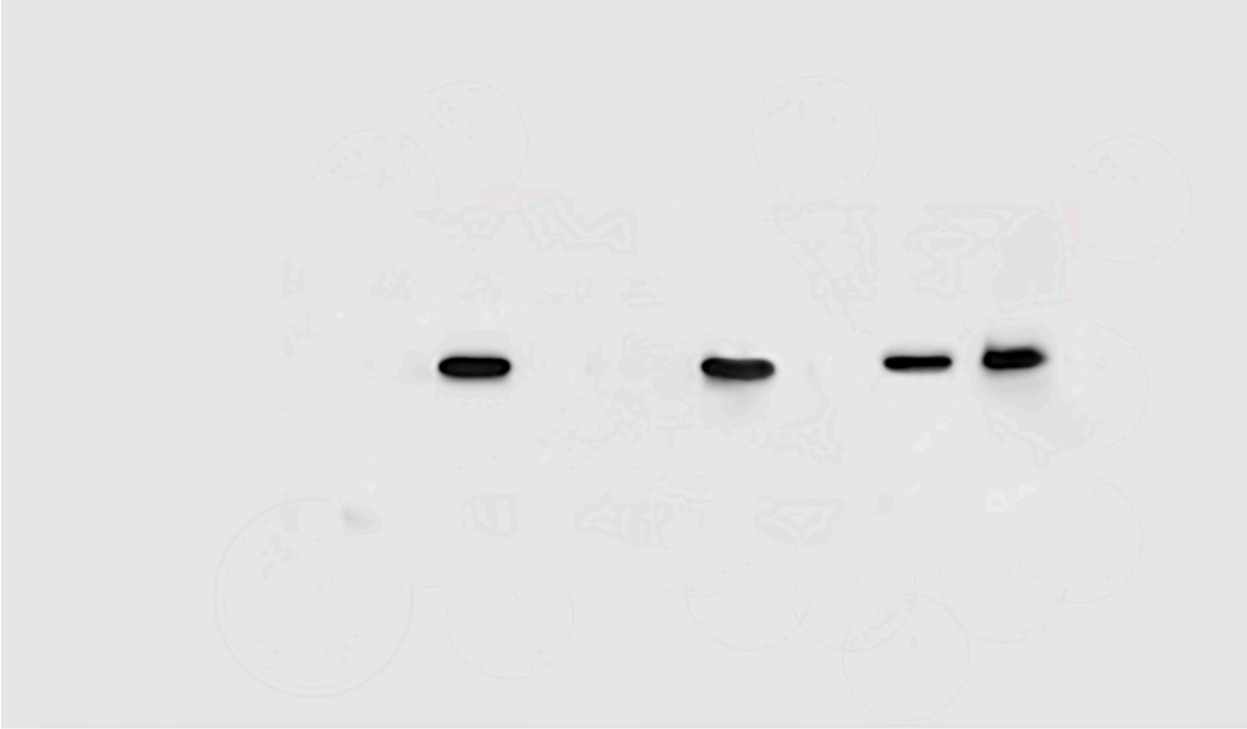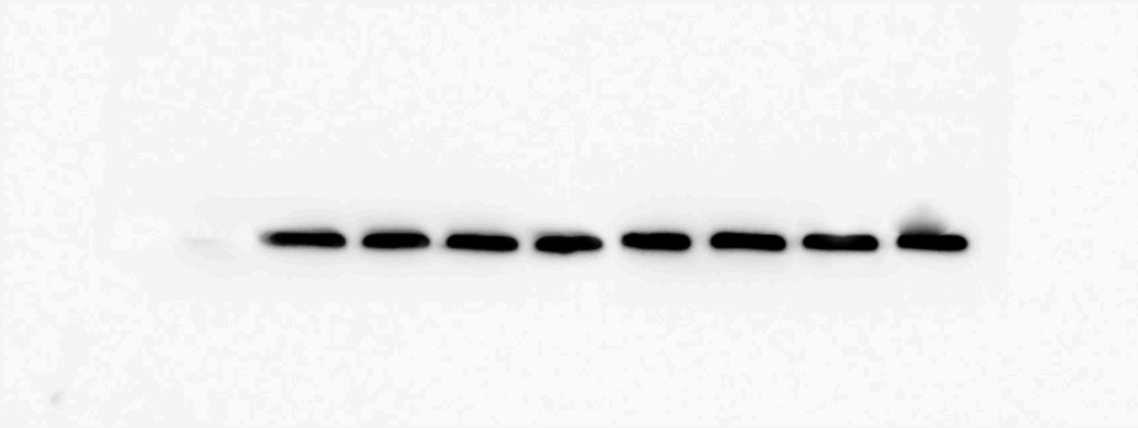

Supplement: pone.0238238.s012.pdf [file pone.0238238.s012.pdf]
